# Supplementary material for: Relapse-Fated Latent Diagnosis Subclones in Acute B Lineage Leukemia Are Drug Tolerant and Possess Distinct Metabolic Programs
Source: Oxford University Press journal article supplement (doi:10.1158/2159-8290.cd-19-1059), 2020-02-21
Supplement: 21598290cd191059-sup-228656_2_supp_6087256_q5kqwz.xlsx [file 21598290cd191059-sup-228656_2_supp_6087256_q5kqwz.xlsx]

## Sheet: Total
		Diagnosis			Relapse			Relapse 2
Patient	Cell Dose	# Engrafted	Frequency	Cell Dose	# Engrafted	Frequency	Cell Dose	# Engrafted	Frequency	Inequality Between Samples
	250000	5/5		250,000	5/5
	10000	8/8		10,000	8/8					not significant
1	1000	7/7	1/14.2	1000	8/8	1/41.7				p=0.248
	100	5/5		100	4/4
	10	2/4		10	0/4
	250000	5/5		250,000	5/5
	10000	7/7		10,000	8/8	1/2085				* (Diagnosis higher)
2	1000	7/7	1/379	1000	3/8					p=0.0128
	100	0/5		100	0/5
	10	0/4		10	0/4
	250000	5/5		250,000	5/5
	10000	6/7		10,000	7/7					****(Relapse higher)
3	1000	2/8	1/4699	1000	8/8	1/362				p=4.37e-5
	100	0/5		100	0/5
	10	0/4		10	0/4
	250000	4/4		250,000	4/4
	10000	6/6		10,000	8/8					not significant
4	1000	0/8	1/4802	1000	2/8	1/2691				p=0.380
	100	0/5		100	0/4
	10	0/4		10	0/4
	500000	2/2		500,000	n.d.
	375000	2/2		375,000	n.d.
	250000	1/2		250,000	5/5					****(Relapse higher)
5	200000	2/2	1/134865	200,000	n.d.	1/1530				p=4.27e-12
	10000	1/12		10,000	7/7
	1000	0/8		1000	4/8
	100	0/8		100	0/4
	10	0/4		10	0/4
	250000	5/5		250,000	4/4
	10000	8/8		10,000	8/8					not significant
6	1000	1/7	1/3208	1000	2/8	1/2712				p=0.795
	100	0/4		100	0/5
	10	0/4		10	0/4
	250000	5/5		250,000	5/5
	10000	8/8		10,000	7/8					not significant
7	1000	3/8	1/2085	1000	2/8	1/4499				p=0.201
	100	0/5		100	0/5
	10	0/4		10	0/4
	500000	n.d.		500,000	2/4		500,000	n.d
	466000	n.d.		466,000	n.d.		466,000	0/3
	375000	n.d		375,000	1/6		375,000	n.d		**** (Diagnosis higher)
8	250000	5/5	1/1102	250,000	2/6	1/811224	250,000	0/5		p=1.82e-29
	10000	8/8		10,000	0/13		10,000	0/8		(Diagnosis to Relapse1)
	1000	4/7		1000	0/8		1000	0/8
	100	1/4		100	0/4		100	0/3
	10	0/3		10	0/4
	250000	5/5		250,000	5/5
	10000	7/8		10,000	4/5					not significant
9	1000	0/8	1/6377	1000	1/7	1/6404				p=0.995
	100	0/4		100	0/5
	10	0/3		10	0/4
	250000	0/5		250,000	5/5
	10000	0/8		10,000	7/8					****(Relapse higher)
10	1000	0/8		1000	1/7	1/5158				p=5.61e-14
	100	0/4		100	0/4
	10	0/4		10	0/4
	250000	5/5		250,000	5/5
	10000	7/7		10,000	8/8					not significant
11	1000	0/8	1/4507	1000	4/8	1/1550				p=0.108
	100	0/5		100	0/5
	10	0/4		10	0/4
	250000	6/6		250,000	5/5
	10000	7/7		10,000	8/8					not significant
12	1000	2/8	1/2747	1000	2/8	1/2712				p=0.984
	100	0/4		100	0/5
	10	0/4		10	0/4
	250000	5/5					250,000	5/5
	10000	8/8					10,000	8/8		not significant
13	1000	2/8	1/2191				1000	3/8	1/2085	p=0.940
	100	1/5					100	0/5
	10	0/4					10	0/4
	250000	5/5		250,000	5/5
	10000	6/6		10,000	8/8					**(Diagnosis higher)
14	1000	8/8	1/274	1000	3/8	1/2085				p=2.29e-03
	100	1/5		100	0/5
	10	0/4		10	0/2

## Sheet: Stats
ALL	Diagnosis Estimate	Diagnosis Upper	Diagnosis Lower	Relapse Estimate	Relapse Upper	Relapse Lower	L-IC Diagnosis	L-IC Relapse	L-IC Relapse2	Chisq	DF	P.value	Sig	Enriched	Timing	chisq d r1	p. value d r1	chisq r1 r2	p. value r1 r2	chisq d r2	p. value d r2
1	14.2	3.74	53.9	41.7	13.82	125.9	0.0704225	0.0239808		1.33	1	0.248	n.s.		Early
2	379	158	911	2085	850	5112	0.00263852	0.000479616		6.2	1	0.0128	*	diagnosis	Late
3	4699	2100	10511	362	156	840	0.000212811	0.00276243		16.7	1	4.37e-05	****	relapse	Early
4	4802	2052	11236	2691	1155	6270	0.000208247	0.000371609		0.77	1	0.38	n.s		Early
5	134865	57108	318496	1530	602	3889	7.41482e-06	0.000653595		48	1	4.27e-12	****	relapse	Late
6	3208	1401	7346	2712	1169	6290	0.000311721	0.000368732		0.0677	1	0.795	n.s		Late
7	2085	850	5112	4499	2087	9701	0.000479616	0.000222272		1.64	1	0.201	n.s		Late
8	1102	448	2714	811224	357282	1841917	0.000907441	1.23271e-06		132	2	1.82e-29	****	diagnosis	Late	112	3.01e-26	5.34	0.0208	121	4.47e-28
9	6377	2940	13833	6404	2497	16425	0.000156814	0.000156152		4.64e-05	1	0.995	n.s		Late
10				5158	2372	11215	NA	0.000193874		56.5	1	5.61e-14	****	relapse	Late
11	4507	2012	10094	1550	618	3889	0.000221877	0.000645161		2.58	1	0.108	n.s		Early
12	2747	1150	6558	2712	1169	6290	0.000364033	0.000368732		0.00038	1	0.984	n.s		Early
13	2191	902	5321	2085	859	5112	0.000456413	0.000479616		0.00566	1	0.94	n.s		Early
14	274	109	690	2080	847	5107	0.00364964	0.000480769		9.3	1	0.00229	**	diagnosis	Late
Median	2747			2388
Median Early	3627			1817.5
Median Late	2085			2712
